# Supplementary material
Source: ML conference proceedings conference paper supplement (https://openreview.net/forum?id=4mXYJzoPhf)

Fixed Valuations

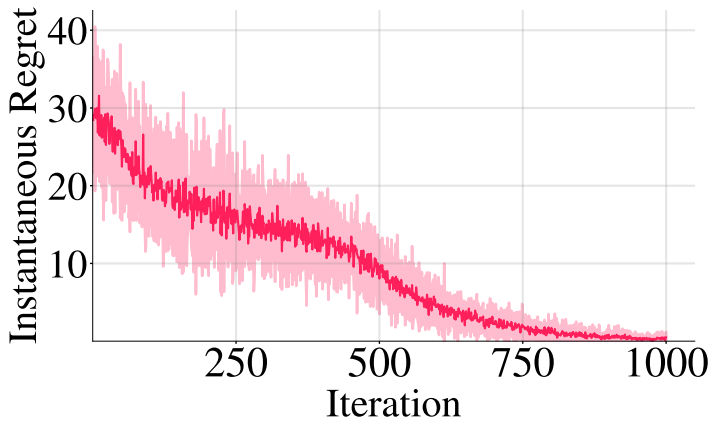

Random Experiences

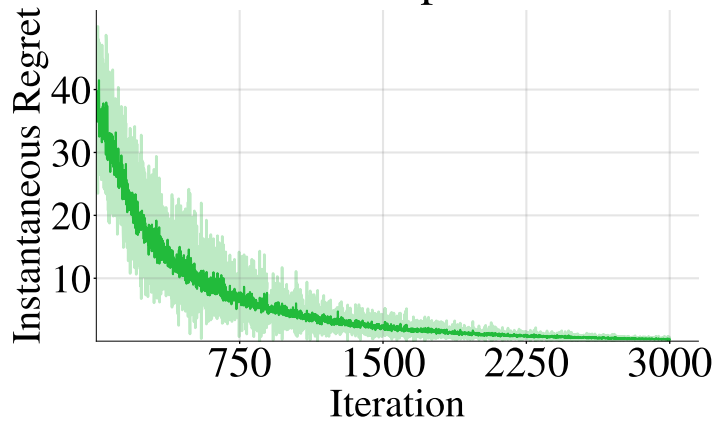

Random Valuations

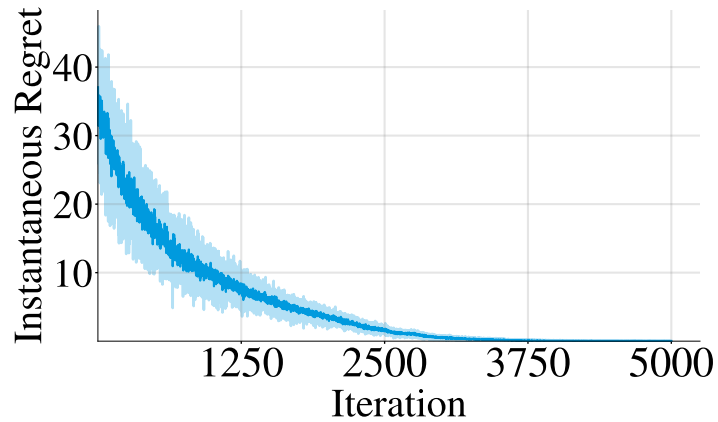

Supplement: supplementary_material [file attachment]

Fixed Valuations

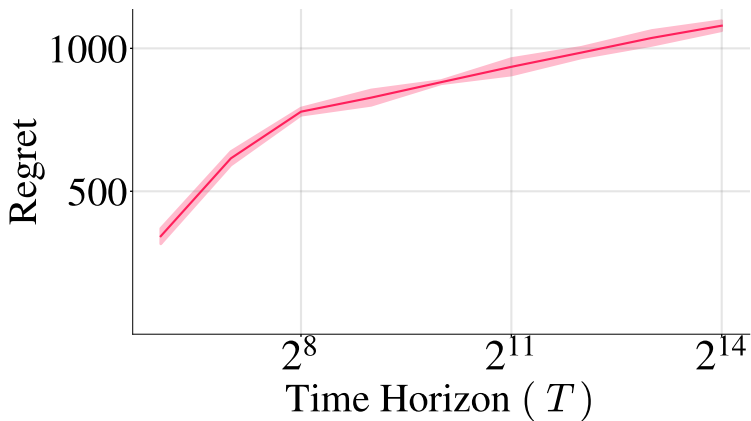

Random Experiences

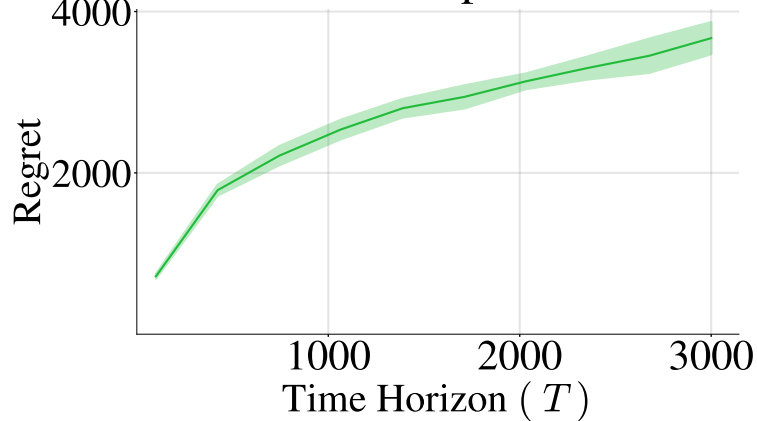

Random Valuations

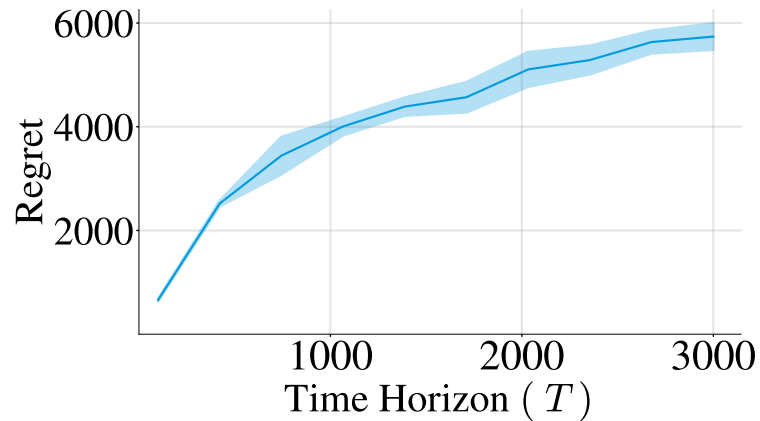

Supplement: supplementary_material [file attachment]
